# Supplementary material
Source: publisher figshare collection journal article supplement (https://asha.figshare.com/articles/dataset/_/28516196)
Supplement: Supplementary file 1 [file 1]

**Supplemental Material S1.** Focus group discussion guide.

| Questions                                                                                                                                                                                                                                                                                                                                                                                                              | TDF Domains                                                                                     |
|------------------------------------------------------------------------------------------------------------------------------------------------------------------------------------------------------------------------------------------------------------------------------------------------------------------------------------------------------------------------------------------------------------------------|-------------------------------------------------------------------------------------------------|
| <p>Describe what equitable assessment for linguistically diverse populations means to you. And what is your approach in assessing this population?</p> <p><i>Follow-up:</i></p> <ul style="list-style-type: none"> <li>- How do you assess children when they speak languages other than or in addition to English?</li> <li>- Why did you choose that specific approach/test/method for that?</li> </ul>              | <p>Beliefs</p> <p>Knowledge</p> <p>Behavior regulation</p>                                      |
| <p>What are some common misconceptions or biases you have observed related to assessing linguistically diverse children, and how have you addressed them?</p> <p><i>Follow-up:</i></p> <ul style="list-style-type: none"> <li>- Can you give an example of any incident of how you did it?</li> </ul>                                                                                                                  | <p>Knowledge</p> <p>Skills</p> <p>Beliefs about consequences</p> <p>Innovation strategy</p>     |
| <p>Can you talk about the challenges you generally encounter when assessing communication disorders diverse linguistic population?</p> <p><i>Follow-up:</i></p> <ul style="list-style-type: none"> <li>- In your opinion how should we make sure, or have you made sure in your practices that you are accurately capturing the abilities and potential of the child?</li> </ul>                                       | <p>Innovation</p> <p>Goals</p> <p>Intentions</p> <p>Behavior regulation</p> <p>Organization</p> |
| <p>What specific skills do you think you possess or ideally professional should have to effectively assess linguistically diverse children? What skills are necessary for interpreting assessment results accurately for linguistically diverse children?</p> <p><i>Follow-up:</i></p> <ul style="list-style-type: none"> <li>- How confident are you in your own skills for carrying out such assessments?</li> </ul> | <p>Professional role</p> <p>Skills</p>                                                          |
| <p>What role do you believe parents and families should play in the assessment process for linguistically diverse children?</p> <p><i>Follow-up:</i></p> <ul style="list-style-type: none"> <li>- What social or cultural considerations should be taken into account when selecting or designing assessment tools?</li> </ul>                                                                                         | <p>Social influences</p> <p>Organization</p>                                                    |
