# Supplementary material
Source: publisher figshare collection journal article supplement (https://asha.figshare.com/articles/dataset/_/28516196)
Supplement: Supplementary file 2 [file 1]

## Supplemental Material S2. Codebook.

| <b>Codes</b>                                              | <b>Definitions<br/>(Cane et al., 2012)</b>                                                                          | <b>Adapted definitions</b>                                                                                                                    | <b>Specific coding examples</b>                                                                                                                                                                                                                                                                                                                                                                                                                                                                               |
|-----------------------------------------------------------|---------------------------------------------------------------------------------------------------------------------|-----------------------------------------------------------------------------------------------------------------------------------------------|---------------------------------------------------------------------------------------------------------------------------------------------------------------------------------------------------------------------------------------------------------------------------------------------------------------------------------------------------------------------------------------------------------------------------------------------------------------------------------------------------------------|
| <b>Knowledge</b>                                          | An awareness of the existence of something                                                                          | Awareness of the relevant principles, rationale and procedural aspects that influence practices to ensure accurate and effective evaluations. | Code, when participants show <ul style="list-style-type: none"> <li>- awareness of concerns and challenges related to assessment practices</li> <li>- assessment of communication disorders in children from birth to 5 years old</li> <li>- an understanding of the assessment process's conditions, rationale, procedures, and environmental considerations.</li> <li>- awareness of relevant principles, procedural aspects, and environmental factors that influence the assessment practices.</li> </ul> |
| <b>Skills</b>                                             | An ability or proficiency acquired through practice                                                                 | Proficiency, competence, ability, practical capabilities, and capacity to conduct assessments effectively                                     | Code when participants speak about their <ul style="list-style-type: none"> <li>- ability or proficiency or skills in assessment practice.</li> <li>- competence, ability, practical capabilities, and capacity to conduct assessments effectively.</li> <li>- experiences working with interpreters and any editions they make to the assessment protocol to meet the needs of the child.</li> <li>- current performance.</li> </ul>                                                                         |
| <b>Social/<br/>professional<br/>role and<br/>identity</b> | Set of behaviors and displayed personal qualities exhibited by the participant in a social or professional context. | A coherent set of behaviors and displayed personal qualities of a practitioner in a social or work setting                                    | Code when participants engage in discussions regarding <ul style="list-style-type: none"> <li>- their professional role at the organization.</li> <li>- social identity/professional identity as a speech-language pathologist, bilingual provider, etc.</li> <li>- the scope of practice of the field or as a professional.</li> <li>- professional boundaries, leadership, and organizational commitment toward fostering unbiased assessment practices.</li> </ul>                                         |

|                                   |                                                                                                                               |                                                                                                                                     |                                                                                                                                                                                                                                                                                                                                                                                                                                                                                                                                                                                                                                                                                                                                                                                 |
|-----------------------------------|-------------------------------------------------------------------------------------------------------------------------------|-------------------------------------------------------------------------------------------------------------------------------------|---------------------------------------------------------------------------------------------------------------------------------------------------------------------------------------------------------------------------------------------------------------------------------------------------------------------------------------------------------------------------------------------------------------------------------------------------------------------------------------------------------------------------------------------------------------------------------------------------------------------------------------------------------------------------------------------------------------------------------------------------------------------------------|
|                                   |                                                                                                                               |                                                                                                                                     | <ul style="list-style-type: none"> <li>- identifying as minoritized and the associated professional responsibilities in this context.</li> </ul>                                                                                                                                                                                                                                                                                                                                                                                                                                                                                                                                                                                                                                |
| <b>Beliefs about capabilities</b> | Acceptance of the truth, reality, or validity about an ability, talent, or facility that a person can put to constructive use | Acceptance of the truth, reality, or validity about their ability, talent, or facility that practitioners can put into assessments. | <p>This code is applicable when participants engage in discussions or express thoughts related to</p> <ul style="list-style-type: none"> <li>- their self/professional confidence, self-esteem, or self-efficacy.</li> <li>- perceived competence, thoughts about their capabilities.</li> <li>- whether they perceive themselves as capable, question their own competence, or express uncertainties about their abilities during their professional role.</li> </ul>                                                                                                                                                                                                                                                                                                          |
| <b>Optimism</b>                   | The confidence that things will happen for the best or that desired goals will be attained                                    | Positive outlook for linguistically diverse children reflecting a hopeful attitude toward their capabilities, and contributions.    | <p>Code Optimism when the discussion involves</p> <ul style="list-style-type: none"> <li>- participants' positive outlook and hopeful perspectives for linguistically diverse children.</li> <li>- positive and hopeful attitude toward the capabilities, potential, and contributions of linguistically diverse children.</li> <li>- beliefs that linguistically diverse children should receive services and support, emphasizing fairness and inclusivity.</li> <li>- responsiveness, indicating adapting communication and support to meet the linguistic needs of diverse children.</li> <li>- optimistic beliefs about linguistically diverse children, trusting them, advocating for equitable services, and endorsing the idea of linguistic responsiveness.</li> </ul> |
| <b>Beliefs about Consequences</b> | Acceptance of the truth, reality, or validity about outcomes of a behavior in a given situation                               | Potential outcomes of their actions or decisions, considering long-term challenges, future regret,                                  | <p>The code is applicable when participants express</p> <ul style="list-style-type: none"> <li>- the potential consequences of their actions or decisions.</li> <li>- the consequences of not taking certain actions, causing long-term challenges, and considerations of future regret.</li> <li>- outcomes of their behaviors, weighing the positive and negative consequences associated with their action.</li> </ul>                                                                                                                                                                                                                                                                                                                                                       |

|                      |                                                                                                                                         |                                                                                                                         |                                                                                                                                                                                                                                                                                                                                                                                                                                                                                                                                                                                                                                                                                                                                                                                                                           |
|----------------------|-----------------------------------------------------------------------------------------------------------------------------------------|-------------------------------------------------------------------------------------------------------------------------|---------------------------------------------------------------------------------------------------------------------------------------------------------------------------------------------------------------------------------------------------------------------------------------------------------------------------------------------------------------------------------------------------------------------------------------------------------------------------------------------------------------------------------------------------------------------------------------------------------------------------------------------------------------------------------------------------------------------------------------------------------------------------------------------------------------------------|
|                      |                                                                                                                                         | and the factors influencing their decisions.                                                                            | - results of their behavior and the factors influencing their decision-making process.                                                                                                                                                                                                                                                                                                                                                                                                                                                                                                                                                                                                                                                                                                                                    |
| <b>Reinforcement</b> | Increasing the probability of a response by arranging a dependent relationship or contingency between the response and a given stimulus | Increasing the probability of a response by acknowledgment or benefits for engaging in valued evidence-based practices. | <p>Code this when participants discuss receiving</p> <ul style="list-style-type: none"> <li>- support by the organization or system in response to certain behaviors, practices, or attributes.</li> <li>- assistance, backing, or encouragement from the organization in the pursuit of specific actions or goals.</li> <li>- acknowledgment or benefits related to a particular type of assessment, especially when it is significant or sensitive to do so.</li> <li>- recognition or positive reinforcement for engaging in specific practices or behaviors deemed valuable by the organization.</li> <li>- motivational rewards or advantages of being a bilingual speech-language pathologist (SLP).</li> <li>- rewards or incentives by the organization to encourage specific behaviors or attributes.</li> </ul> |
| <b>Intentions</b>    | A conscious decision to perform a behavior or a resolve to act in a certain way                                                         | A conscious decision or strong desire to change to improve and an explicit commitment to enhance current practices.     | <p>Code when participants express</p> <ul style="list-style-type: none"> <li>- a conscious decision or a <b>strong desire</b> for a behavior to make a change in their current practice (may not be actually practicing that behavior).</li> <li>- intention to improve, the desire to do better, and the explicit commitment to change (change may not have happened).</li> <li>- willingness to adopt new ideas, references to specific training, and explicit desire to enhance their professional practice.</li> </ul>                                                                                                                                                                                                                                                                                                |

|                                                 |                                                                                                                                 |                                                                                                     |                                                                                                                                                                                                                                                                                                                                                                                                                                                                                                                                                                                                      |
|-------------------------------------------------|---------------------------------------------------------------------------------------------------------------------------------|-----------------------------------------------------------------------------------------------------|------------------------------------------------------------------------------------------------------------------------------------------------------------------------------------------------------------------------------------------------------------------------------------------------------------------------------------------------------------------------------------------------------------------------------------------------------------------------------------------------------------------------------------------------------------------------------------------------------|
| <b>Goals</b>                                    | Mental representations of outcomes or end states that an individual wants to achieve                                            | Active and ongoing efforts, plans, and strategies implemented during assessments process.           | <p>Code when participants articulate</p> <ul style="list-style-type: none"> <li>- their aspirations, intentions, or active efforts directed towards achieving specific outcomes.</li> <li>- their desire for professional development, outreach activities, and specialization in specific areas.</li> <li>- the planning to be linguistically responsive in practice.</li> <li>- their engagement in tasks or efforts directed towards achieving a goal for linguistic responsivity.</li> <li>- their ongoing efforts, plans, or strategies they are implementing during the assessment.</li> </ul> |
| <b>Memory, attention and decision processes</b> | The ability to retain information, focus selectively on aspects of the environment, and choose between two or more alternatives | The capacity to retain and recall information acquired through experiences, education, or training. | <p>Participants may discuss challenges or experiences</p> <ul style="list-style-type: none"> <li>- remembering information learned in graduate school.</li> <li>- forgetfulness</li> <li>- conducting assessments due to constraints in memorization.</li> </ul>                                                                                                                                                                                                                                                                                                                                     |

|                                                   |                                                                                                                                                                                               |                                                                                                                                                                                            |                                                                                                                                                                                                                                                                                                                                                                                                                                                                                                                                                                                                                                                                                                                                                                                                                                                                                                                                                                                                                                                                                    |
|---------------------------------------------------|-----------------------------------------------------------------------------------------------------------------------------------------------------------------------------------------------|--------------------------------------------------------------------------------------------------------------------------------------------------------------------------------------------|------------------------------------------------------------------------------------------------------------------------------------------------------------------------------------------------------------------------------------------------------------------------------------------------------------------------------------------------------------------------------------------------------------------------------------------------------------------------------------------------------------------------------------------------------------------------------------------------------------------------------------------------------------------------------------------------------------------------------------------------------------------------------------------------------------------------------------------------------------------------------------------------------------------------------------------------------------------------------------------------------------------------------------------------------------------------------------|
| <p><b>Environmental context and resources</b></p> | <p>Any circumstance of a person's situation or environment that discourages or encourages the development of skills and abilities, independence, social competence, and adaptive behavior</p> | <p>Any circumstances of the practitioner's environment that discourages or encourages the development of skills and abilities, independence, and adaptive behavior during assessments.</p> | <p>Code when participants discuss</p> <ul style="list-style-type: none"> <li>- experiences and interactions within their environment.</li> <li>- factors within the environment that contribute to their performance during the assessment process.</li> <li>- elements in the environment that either support or hinder the growth and enhancement of skills and abilities.</li> <li>- self-reliance and autonomy in participants due to the workplace.</li> <li>- factors influencing their ability to navigate and interact effectively within their social environment.</li> <li>- how they are supported or hindered by their environmental context.</li> <li>- the availability of resource materials and the allocation of funds.</li> <li>- the influence of financial resources, and policies that shape their work.</li> <li>- the environmental facilitation and adaptive responses to different situations and challenges.</li> <li>- issues such as compensation, particularly when the organization does not provide remuneration for certain activities.</li> </ul> |
| <p><b>Social influences</b></p>                   | <p>Those interpersonal processes that can cause individuals to change their thoughts, feelings, or behaviors</p>                                                                              | <p>Those interpersonal processes that can cause practitioners to change their thoughts, feelings, or behaviors.</p>                                                                        | <p>Participants may share experiences related to</p> <ul style="list-style-type: none"> <li>- peer pressure, and the impact of social influences on their decision-making during assessment.</li> <li>- mentorship dynamics during work or outside work.</li> <li>- social norms and pressures contribute to their professionalism, behaviors, and attitudes towards linguistically diverse children.</li> </ul>                                                                                                                                                                                                                                                                                                                                                                                                                                                                                                                                                                                                                                                                   |

|                              |                                                                                                                                                                                    |                                                                                                                                                                         |                                                                                                                                                                                                                                                                                                                                                                                                                                                                                                         |
|------------------------------|------------------------------------------------------------------------------------------------------------------------------------------------------------------------------------|-------------------------------------------------------------------------------------------------------------------------------------------------------------------------|---------------------------------------------------------------------------------------------------------------------------------------------------------------------------------------------------------------------------------------------------------------------------------------------------------------------------------------------------------------------------------------------------------------------------------------------------------------------------------------------------------|
|                              |                                                                                                                                                                                    |                                                                                                                                                                         | - social comparisons with colleagues and navigating social groupings.                                                                                                                                                                                                                                                                                                                                                                                                                                   |
| <b>Emotion</b>               | A complex reaction pattern, involving experiential, behavioral, and physiological elements, by which the individual attempts to deal with a personally significant matter or event | A complex reaction pattern, involving experiential, behavioral, and physiological elements, by which the practitioner attempts to deal with an event during assessment. | <p>Code when participants express</p> <ul style="list-style-type: none"> <li>- emotions related to their professional experiences.</li> <li>- feeling overwhelmed by fear, experiencing anxiety or stress, and contending with positive or negative affective states.</li> <li>- instances where participants discuss being moved to tears or experiencing difficulty due to the emotional impact of their work.</li> <li>- burnout (a state of emotional, mental, and physical exhaustion).</li> </ul> |
| <b>Behavioral regulation</b> | Anything aimed at managing or changing objectively observed or measured actions                                                                                                    | Anything aimed at managing or changing objectively observed or measured actions.                                                                                        | <p>Code when participants discuss</p> <ul style="list-style-type: none"> <li>- strategies, such as self-monitoring and/or breaking habits.</li> <li>- examples of behavior regulation include the use of to-do lists and joining specific organizations with the intention of learning.</li> <li>- discuss strategies for behavior change.</li> <li>- conscious efforts to actively manage, modify, or improve their behaviors.</li> </ul>                                                              |
