# Supplementary material
Source: publisher figshare collection journal article supplement (https://asha.figshare.com/articles/dataset/_/28516196)
Supplement: Supplementary file 3 [file 1]

### Supplemental Material S3. Themes across domains.

| Overarching Themes                               | Domains                                  |
|--------------------------------------------------|------------------------------------------|
| 1. Role of Family                                | a. Knowledge                             |
| 2. Flexibility and Adaptability                  | b. Skills                                |
| 3. Limitations of the Assessment Tools           | c. Social Professional Role and Identity |
| 4. Need for Help (training, research and expert) | d. Beliefs about Capabilities            |
| 5. Language difference/mismatch                  | e. Beliefs about Consequences            |
|                                                  | f. Intentions                            |
|                                                  | g. Goals                                 |
|                                                  | h. Environmental Context and Resources   |
|                                                  | i. Social Influences                     |

Note:

*Theme 1 appeared in domains a, b, c, e, f, and g.*

*Theme 2 appeared in domains a, b, g, and h.*

*Theme 3 appeared in domains a and e.*

*Theme 4 appeared in domains a, c, e, and h.*

*Theme 5 appeared in domains a, c, e, and i.*
